# Supplementary material for: Room Temperature Broadband Bi2Te3/PbS Colloidal Quantum Dots Infrared Photodetectors
Source: MDPI journal article supplement (doi:10.3390/s23094328), 2023-04-27
Supplement: s1 [file s1]

# Room Temperature Broadband Bi<sub>2</sub>Te<sub>3</sub>/PbS Colloidal Quantum Dots Infrared Photodetectors

Lijing Yu <sup>1,2,3</sup>, Pin Tian <sup>2,3</sup>, Libin Tang <sup>1,2,3,\*</sup>, Wenbin Zuo <sup>2</sup>, Hefu Zhong <sup>4</sup>, Qun Hao <sup>1,\*</sup>, Kar Seng Teng <sup>5,\*</sup>, Guiqin Zhao <sup>2</sup>, Runhong Su <sup>2</sup>, Xiaoxia Gong <sup>2</sup> and Jun Yuan <sup>2</sup>

<sup>1</sup> School of Optics and Photonics, Beijing Institute of Technology, Beijing 100081, China

<sup>2</sup> Kunming Institute of Physics, Kunming 650223, China

<sup>3</sup> Yunnan Key Laboratory of Advanced Photoelectronic Materials & Devices, Kunming 650223, China

<sup>4</sup> School of Materials and Energy, Yunnan University, Kunming 650500, China

<sup>5</sup> Department of Electronic and Electrical Engineering, Swansea University, Bay Campus, Fabian Way, Swansea SA1 8EN, UK

\* Correspondence: scitang@163.com (L.T.); qhao@bit.edu.cn (Q.H.); k.s.teng@swansea.ac.uk (K.S.T.)

## S1. Discussion on magnetron sputtering process of Bi<sub>2</sub>Te<sub>3</sub> film

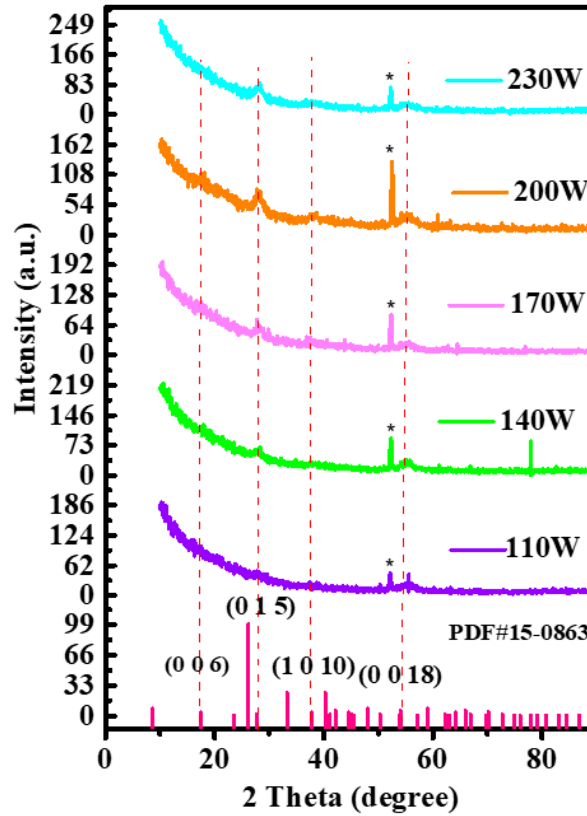

Figure S1. X-ray diffraction (XRD) patterns of Bi<sub>2</sub>Te<sub>3</sub> film grown under different sputtering power

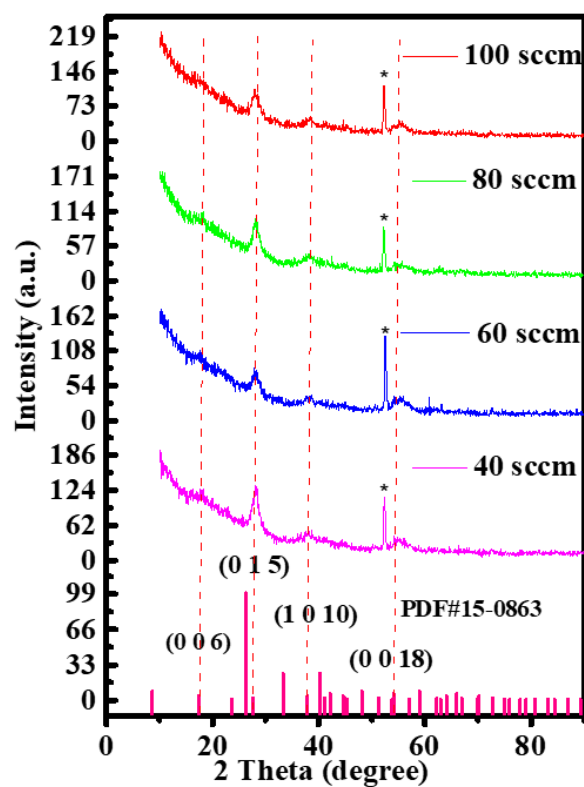

**Figure S2.** X-ray diffraction (XRD) patterns of Bi<sub>2</sub>Te<sub>3</sub> film grown under different gas rate

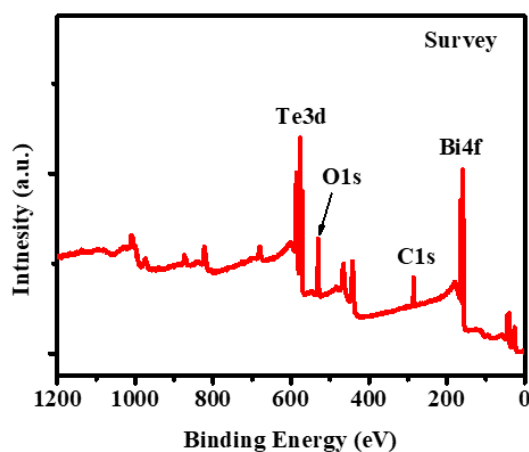

**Figure S3.** X-ray photoelectron spectroscopy (XPS) survey scan of Bi<sub>2</sub>Te<sub>3</sub> film

## S2. Discussion on PbS devices (without Bi<sub>2</sub>Te<sub>3</sub>)

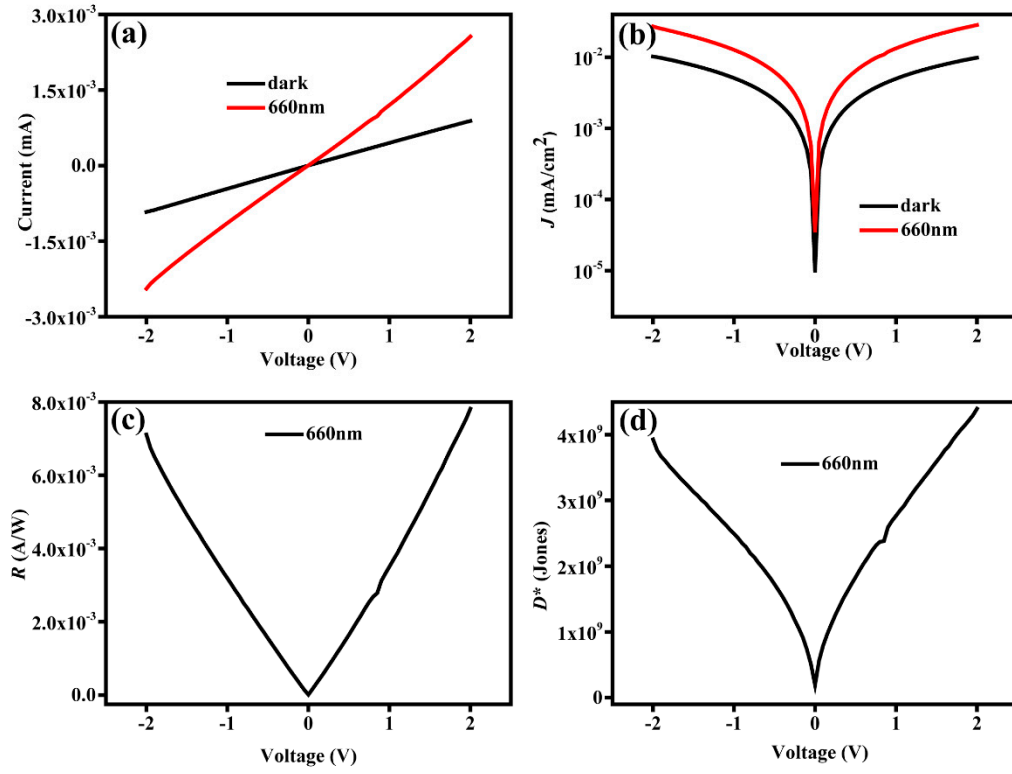

**Figure S4.** PbS devices without Bi<sub>2</sub>Te<sub>3</sub>. (a, b) *I-V* curves of the photodetector under 660 nm illumination. (c) Plot of responsivity ( $R$ ) against voltage ( $V$ ). (d) Plot of detectivity ( $D^*$ ) against voltage ( $V$ ).
